# Supplementary material
Source: PubMed Central journal article supplement (PMC3780590)
Supplement: NIHMS508079-supplement-2.pdf [file NIHMS508079-supplement-2.pdf]

## **SUPPLEMENTARY FIGURES**

**Supplementary Figure 1: Up-regulation of FoxP3 in expanded Treg.** (A) gating for flow sorting of Treg and Teff cells. (B) Fresh PBMC and expanded cells (round 2) were stained for CD3, CD4, CD25, CD127, and FoxP3. Treg were gated on  $CD4^+CD25^{hi}CD127^-$ ; Teff were gated on  $CD4^+CD25^-$ . FoxP3 MFI (upper right corner of each panel) in expanded Treg is compared with that in fresh bulk T cells, fresh Treg, fresh Teff, and expanded Teff. Expanded Treg show significantly increased FoxP3 expression.

**Supplementary Figure 2: Expanded Treg and Teff significantly down-regulate CD52 expression.**

T cells from LN were stained for CD3, CD4, CD25, CD127 and CD52. CD52 MFI (shown in the upper right corner of each panel) was analyzed for bulk T cells, fresh (unexpanded) Treg (gated for  $CD4^+CD25^{hi}CD127^-$ ) and fresh (unexpanded) Teff (gated for  $CD4^+CD25^-$ ). In the same experiment, Treg and Teff were analyzed for CD52 after round 2 of expansion. Expanded cells showed a 10-fold decrease in CD52 expression after the second round of expansion.

**Supplementary Figure 3: Alemtuzumab does not kill expanded Treg**

T cells were incubated with alemtuzumab at the concentrations shown to determine apoptosis and killing of cells. Fresh T cells (top row) showed increasing 7-AAD and Annexin-V staining as the concentration of alemtuzumab increased. In contrast, expanded Treg (middle row) showed a relatively low baseline level of Annexin-V and 7-AAD staining, which remained unchanged, irrespective of the concentration of alemtuzumab. Expanded Teff (bottom row) had a higher baseline level of Annexin-V and 7-AAD staining, but did not show any increase when alemtuzumab was added. Data are representative of 2 separate experiments.

**Supplementary Figure 4: Alemtuzumab-containing serum, taken immediately after mAb infusion, does not kill expanded Treg.**

Monkey serum was drawn pre-alemtuzumab, immediately after a second dose (d5), immediately before and after a third dose (d12), and 1 week after the third dose (d20). These sera were incubated with freshly-isolated monkey T cells and expanded autologous Treg. Histograms of Annexin-V and 7-AAD staining are shown. Fresh cells showed an increase in apoptosis and cell killing in response to high concentrations of alemtuzumab in the blood (d5 post-alemtuzumab, d12 post-alemtuzumab), as well as when exposed to pre-alemtuzumab serum to which 10 µg/ml of alemtuzumab had been added (far right). Values returned to baseline levels of apoptosis and killing when fresh T cells were incubated with serum obtained 1 week after alemtuzumab infusion (d12pre, d20), indicating that serum contained high concentrations of alemtuzumab early after infusion. Expanded autologous Treg showed no increase in apoptosis or killing when exposed to a high concentration of alemtuzumab in serum, whether the serum was drawn from an alemtuzumab-treated monkey, or whether alemtuzumab had been added to the serum *in vitro* (far right).
