# Supplementary material
Source: PubMed Central journal article supplement (PMC3780590)

Supplementary Figure 1

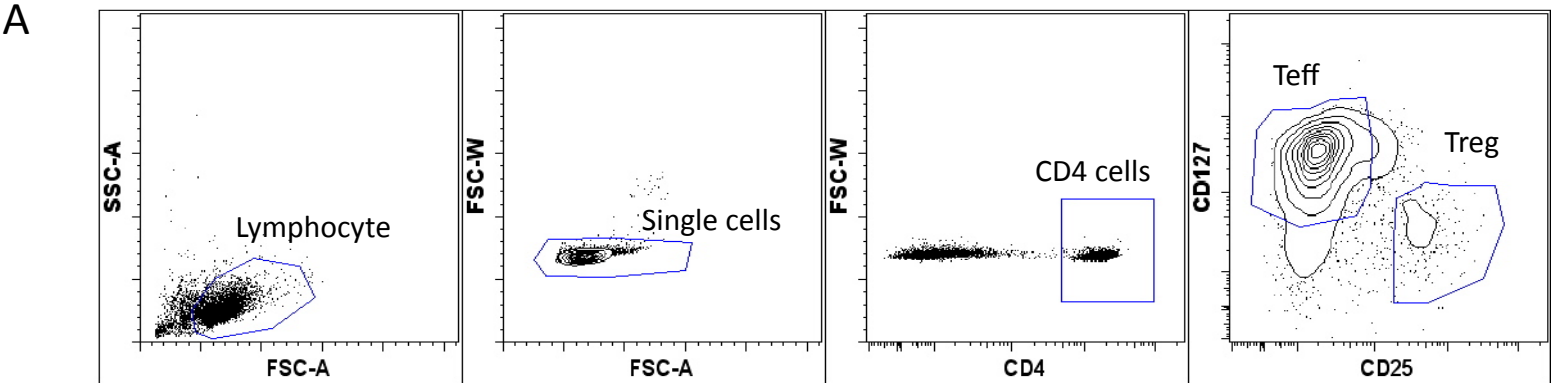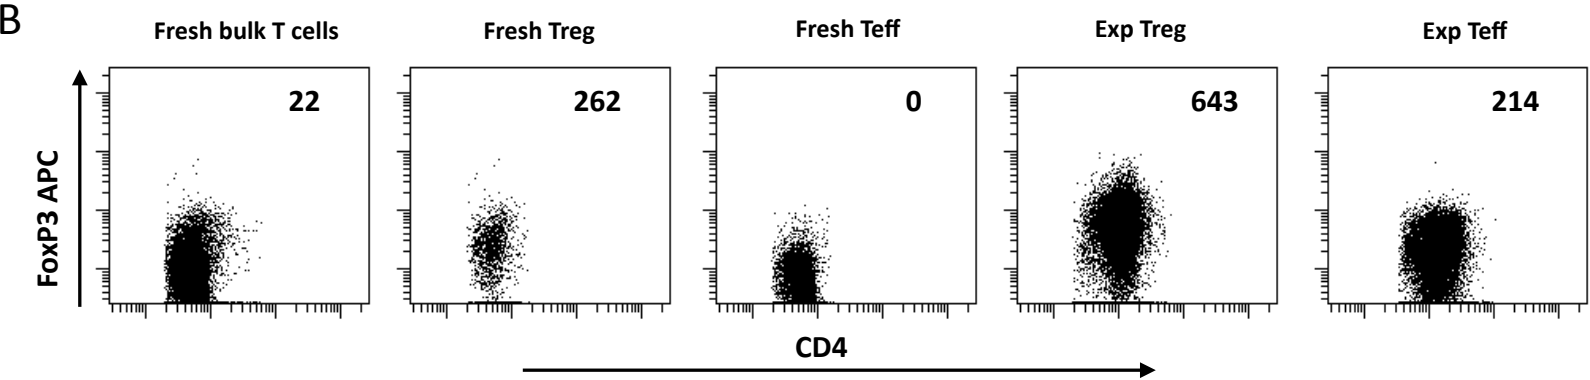

Supplementary Figure 2

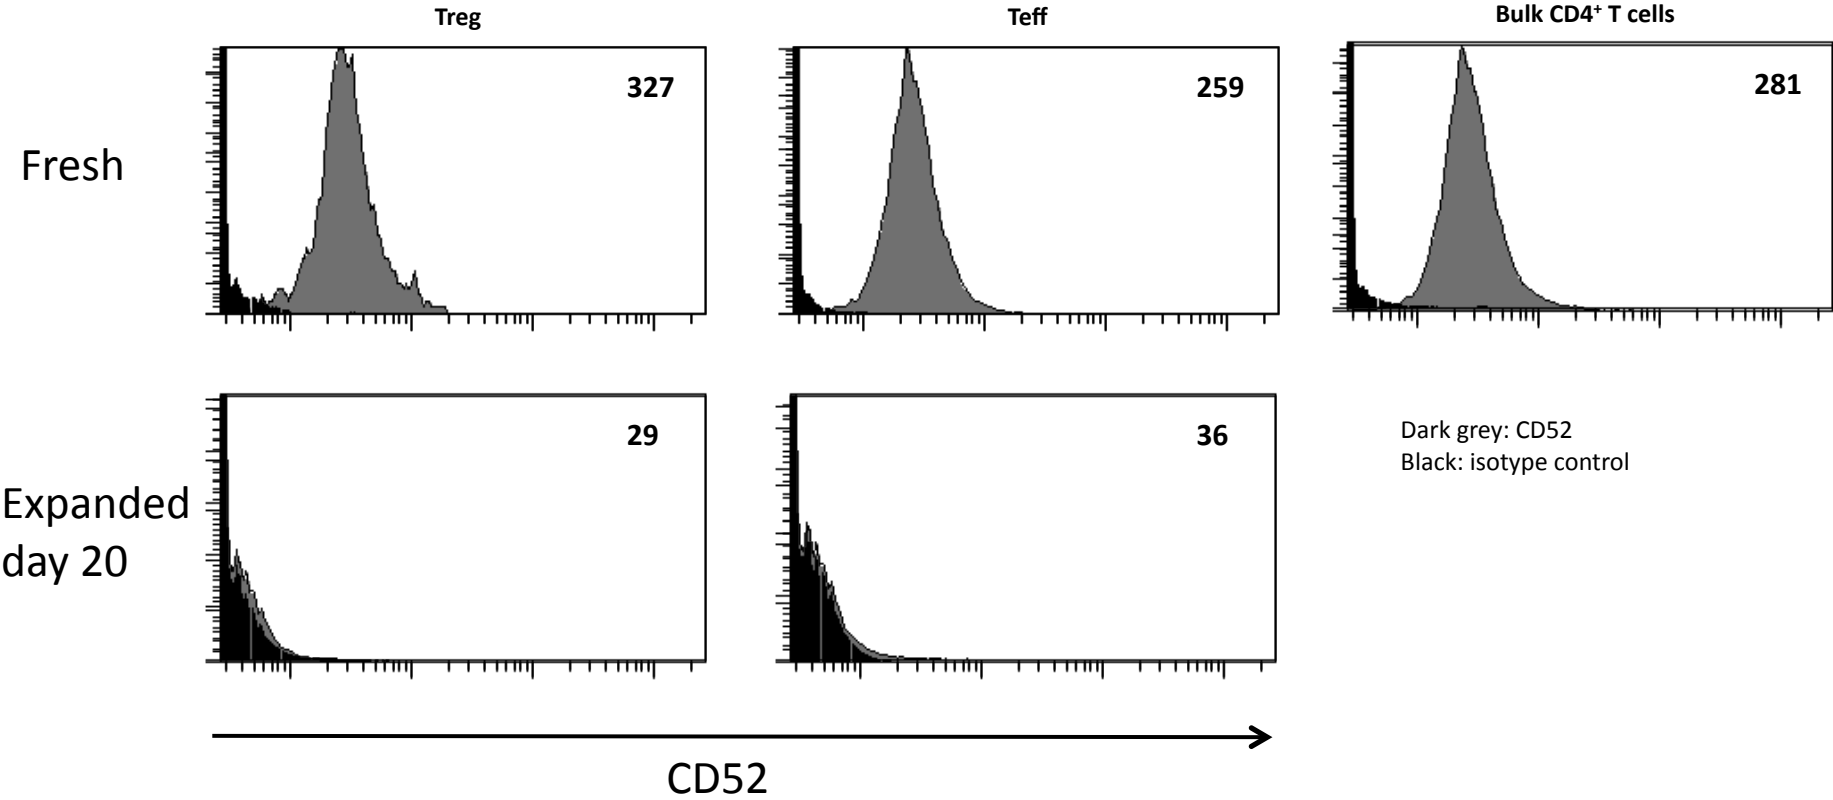

Supplementary Figure 3

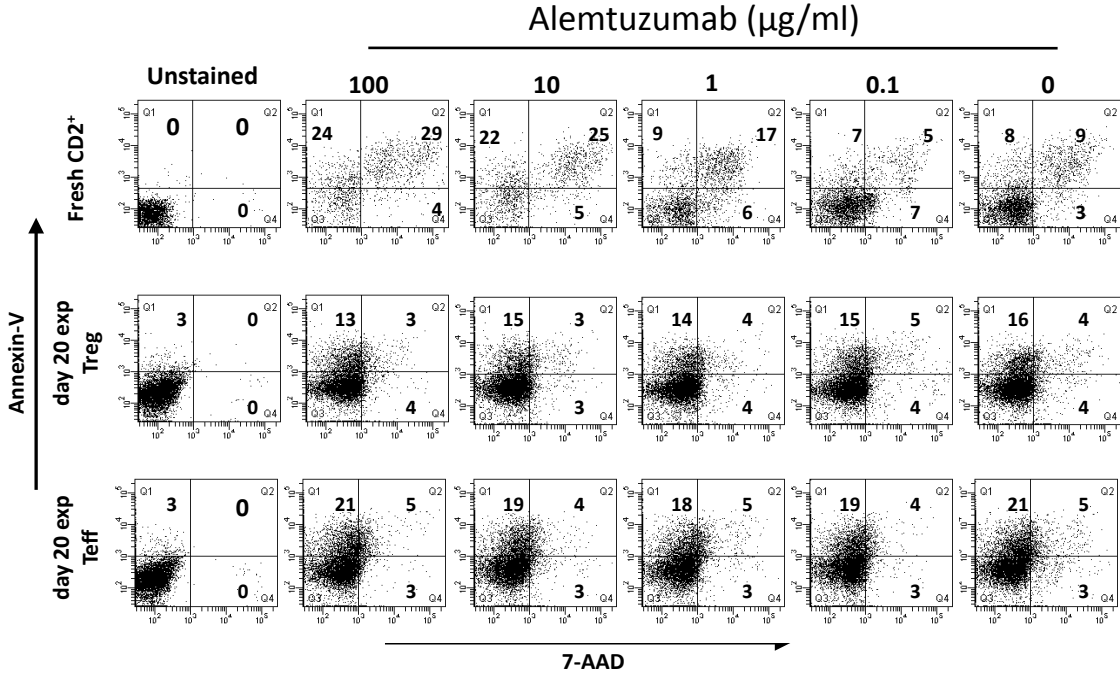

# Supplementary Figure 4

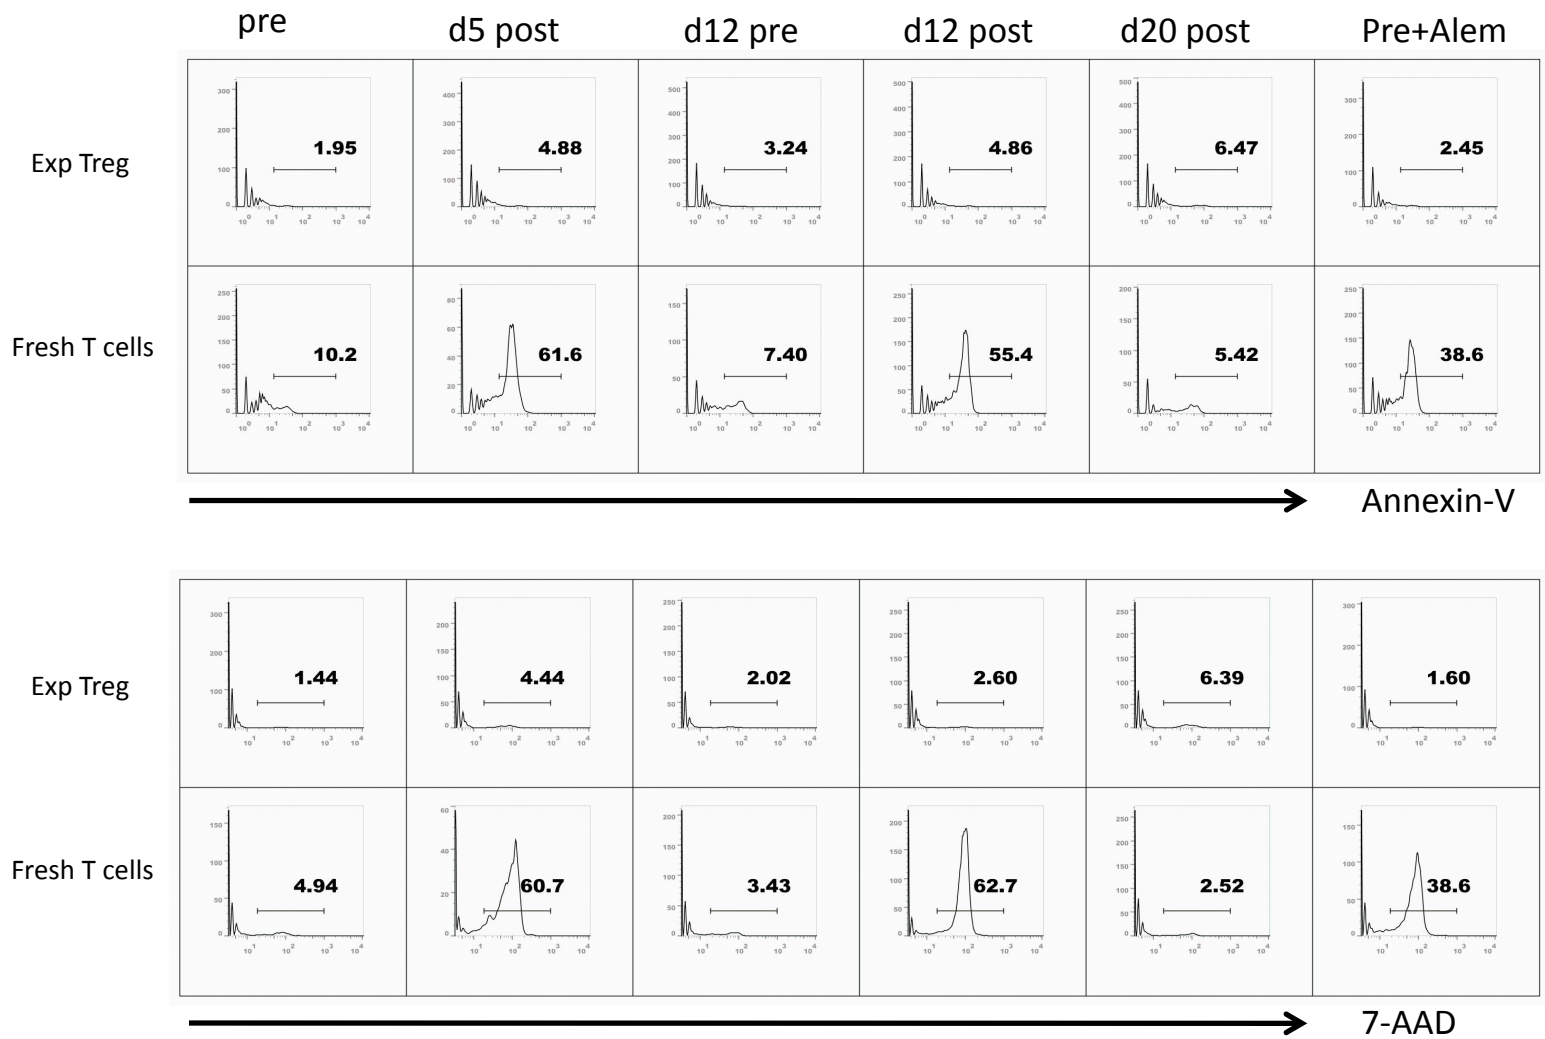

Supplement: NIHMS508079-supplement-Supp_Fig_S1-S4.pdf [file NIHMS508079-supplement-Supp_Fig_S1-S4.pdf]
